1 **Title: Efficient Multiplex Genome Editing Tools identified by Protoplast**  
2 **Technology in *Phalaenopsis***

3

4 **Running title:** Multiplex Genome Editing Tools for *Phalaenopsis*

5

6 **Authors:**

7 Keke Xia<sup>1#</sup>, ([xiakeke@genomics.cn](mailto:xiakeke@genomics.cn))

8 Dengwei Zhang<sup>1#</sup>, ([scdzzdw@163.com](mailto:scdzzdw@163.com))

9 Guangyu Liu<sup>1</sup>, ([liuguangyu@genomics.cn](mailto:liuguangyu@genomics.cn))

10 Xiaojing Xu<sup>1</sup>, ([xuxiaojing@genomics.cn](mailto:xuxiaojing@genomics.cn))

11 Yong Yang<sup>1</sup>, ([thinkinggrass@163.com](mailto:thinkinggrass@163.com))

12 Guo-Qiang Zhang<sup>3</sup>, ([guoqiangzhangcn@163.com](mailto:guoqiangzhangcn@163.com))

13 Hai-Xi Sun<sup>1\*</sup>, ([sunhaixi@genomics.cn](mailto:sunhaixi@genomics.cn))

14 Ying Gu<sup>1,2\*</sup>, ([guying@genomics.cn](mailto:guying@genomics.cn))

15

16 **Author affiliations:**

17 <sup>1</sup> BGI-Shenzhen, Shenzhen 518083, China.

18 <sup>2</sup> Guangdong Provincial Key Laboratory of Genome Read and Write, BGI-Shenzhen,  
19 Shenzhen, 518120, China

20 <sup>3</sup> Laboratory for Orchid Conservation and Utilization, The Orchid Conservation and  
21 Research Center of Shenzhen, The National Orchid Conservation Center of China,  
22 Shenzhen 518114, China.

23

24 **\* Authors for correspondence:**

25 Ying Gu ([guying@genomics.cn](mailto:guying@genomics.cn)) or Hai-Xi Sun ([sunhaixi@genomics.cn](mailto:sunhaixi@genomics.cn))

26 Tel: 86-0755-33945515

27 Fax: 86-0755-32960023

28

29 # These authors contributed equally to this work and should be considered co-first  
30 authors.

31

32 **Abstract**

33 *Phalaenopsis* orchids are popular ornamental plants worldwide. The application of the  
34 efficient multiplex genome editing tools in *Phalaenopsis*, will greatly accelerate the  
35 development of orchid gene function and breeding research. In this study, we establish  
36 a fast and convenient *Phalaenopsis* protoplast platform for the identification of  
37 functional genome editing tools. Two multiplex genome editing tools, PTG-Cas9 (PTG,  
38 polycistronic tRNA gRNA) system and PTGm-Cas9 (PTG-Cas9 system with modified  
39 sgRNA structure) system are designed to edit *PDS* gene of commercial *Phalaenopsis*  
40 ST166 at four target sites. We find that both PTG-Cas9 and PTGm-Cas9 system are  
41 functional in *Phalaenopsis*, and the PTGm-Cas9 system with modified sgRNA has a  
42 higher editing efficiency than PTG-Cas9 system. Further, we design another multiplex  
43 genome editing tool, termed as DP11-Cpf1 system (dual Pol II promoter to drive the  
44 expression of Cpf1 endonuclease and crRNA), to edit *PDS* gene of *Phalaenopsis* at four  
45 target sites likewise. All the four targets are efficiently edited by DP11-Cpf1 system, and  
46 the total mutation rate is about 3 times higher than that of PTGm-Cas9 system. Taken  
47 together, using the *Phalaenopsis* protoplast platform, we successfully establish two  
48 efficient multiplex genome editing tools for *Phalaenopsis* research, PTGm-Cas9 and  
49 DP11-Cpf1. The multiplex genome editing tools established in this study have great  
50 application potentials in efficiently constructing large-scale knockout mutant libraries  
51 of orchid and speeding up orchid precise breeding.

52

53 **Keywords:** *Phalaenopsis*, protoplast, Cas9, Cpf1, orchid, multiplex genome editing

54

## 55 Introduction

56 *Phalaenopsis* species are worldwide popular ornamental plants and are of enormous  
57 value to commercial horticulture and plant scientific research<sup>1</sup>. However, due to the  
58 long growth cycle and the lack of efficient genetic transformation and genome editing  
59 technologies on Orchidaceae plants, the investigation into orchid genome function and  
60 the breeding of new orchid species are seriously hindered. In recent years, the fast  
61 progresses in genomics, including sequencing technology and genome editing  
62 technology such as CRISPR/Cas (Clustered Regularly Interspaced Short Palindromic  
63 Repeats/CRISPR-associated endonuclease) system, provide valuable genome  
64 sequences of Orchidaceae plants and powerful tools for rapid orchid breeding and  
65 orchid horticulture research.

66  
67 For the past few years, the draft genome sequences of two Orchidaceae, *Phalaenopsis*  
68 *equestris*<sup>1</sup> and *Dendrobium catenatum* Lindl.<sup>2</sup>, are released. And a large number of  
69 functional gene families of orchid have been excavated, such as crassulacean acid  
70 metabolism (CAM) genes, MADS-box genes, disease resistance genes and heat-shock  
71 protein genes. These findings provide key resources for further studies on orchid gene  
72 function and orchid genetic improvement. Editing and obtaining the mutants of these  
73 functional genes is one of the necessary approaches for further orchid researches.

74  
75 The CRISPR/Cas genome editing technology is a simple and efficient system for gene  
76 knockout and other genetic manipulation, and it has been successfully applied to  
77 various plant species<sup>3-9</sup>, including *Phalaenopsis equestris*<sup>10</sup> and *Dendrobium*  
78 *officinale*<sup>11</sup>. The diverse and expanding CRISPR toolkits are flexible and efficient to  
79 achieve precise genome editing and transcriptome regulation<sup>12,13</sup>. Moreover,  
80 researchers could obtain transgene-free mutant plants based on the CRISPR/Cas  
81 system<sup>14-16</sup>. Particularly, many versatile and multiplexed CRISPR expression systems  
82 have been developed, such as single transcript unit system<sup>17,18</sup>, polycistronic tRNA-  
83 gRNA system<sup>19,20</sup>, and HH-gRNA-HDV system<sup>20-22</sup>, enabling to edit multiple genes  
84 simultaneously without sacrificing the length of expression cassettes and the editing  
85 efficiency. The flexible multiplex CRISPR toolkits are ideal approaches to efficiently  
86 and high-throughput obtain multiple mutants of orchid for breeding and horticulture  
87 research. However, up to now, there is only one study that successfully generated  
88 mutants of *MADS* genes in *Phalaenopsis equestris* using CRISPR/Cas9 system<sup>10</sup>. In  
89 contrast, no report has been published for the use of CRISPR/Cpf1 system in orchid  
90 research, largely due to the difficult genetic transformation in *Phalaenopsis*. Therefore,  
91 the establishment of a platform in Orchidaceae to rapidly screen functional and efficient  
92 CRISPR/Cas toolkits is urgently needed.

93  
94 Plant protoplasts-based platform is a reliable and convenient strategy for plant science  
95 researches<sup>23</sup>. Transient protoplast transfection technology has been widely used to  
96 investigate gene regulations, and to study the subcellular localization and interaction of  
97 proteins, and is also an alternative strategy to screen efficient CRISPR toolkits in

98 plants<sup>24-26</sup>. Thus far, orchid protoplasts have been successfully isolated from  
99 *Dendrobium*<sup>27-29</sup>, and *Phalaenopsis*<sup>30-32</sup>, and the orchid protoplast transient expression  
100 system has been established in *Phalaenopsis aphrodite subsp. formosana* (m1663)<sup>31</sup>,  
101 *Phalaenopsis* hybrid cultivar ‘Ruili Beauty’<sup>32</sup>, and *Cymbidium* orchid<sup>33</sup>. However,  
102 these orchid protoplast transient expression technologies have not been applied to  
103 screen efficient CRISPR-Cas toolkits for orchid research.

104  
105 In this study, we established a seedling-leaf protoplast-based platform to rapidly  
106 identify functional and efficient multiplex genome editing systems in *Phalaenopsis*. We  
107 found that the PTG-Cas9 multiplex genome editing tool was effective in *Phalaenopsis*,  
108 and replacing the classical sgRNA scaffold with a modified sgRNA scaffold, could  
109 further increase the editing efficiency. In addition, we built an efficient DPPII-Cpf1  
110 system for *Phalaenopsis* multiplex genome editing. The efficient toolkits developed in  
111 this study would facilitate the construction of large-scale mutant libraries and therefore  
112 promote the development of precise breeding of orchids.

## 114 **Results**

### 115 **Assessment of PTG-Cas9 multiplex genome editing system in *Phalaenopsis* via** 116 **protoplast technology.**

117 CRISPR/Cas genome editing technologies, especially the multiplex genome editing  
118 toolkits, have great potential to be used to build large-scale knockout mutant library and  
119 to investigate gene function and then to facilitate breeding research. However, due to a  
120 deficiency of the rapid screening technology for orchid, researchers are unable to  
121 optimize the gene editing tools for Orchidaceae plants. To overcome this obstacle, we  
122 established a convenient and efficient transient protoplast platform in commercial  
123 *Phalaenopsis* ST166. Two-month-old seedling leaves of aseptic *Phalaenopsis* ST166  
124 leaves, cultured in multiplication medium, were cut into 0.5~1.0-mm strips and digested  
125 by protoplast isolation solution (PIS). After only 3 hours of enzymolysis, protoplasts  
126 were washed and prepared for transfection (Fig. 1). To estimate the transfection  
127 efficiency, the plasmid pS1300-GFP (Fig. S1a) that expresses green fluorescent protein  
128 (GFP) was transfected into protoplast via PEG mediated plasmid transformation  
129 method. The GFP signals were detected in about 55% of protoplasts (Fig. S1b, c). The  
130 *Phalaenopsis* protoplast transient expression technology was then used for the  
131 following gene editing experiments.

132 tRNA-based multiplex genome editing tools have been widely used in plant researches,  
133 but not in Orchidaceae. To assess the feasibility of these tools in orchid plants, we  
134 cloned a fragment of *PDS* gene of *Phalaenopsis* ST166, according to the published  
135 genome sequences of *Phalaenopsis equestris*, and designed PTG-Cas9 multiplex  
136 genome editing system that contains four gRNAs targeting the *PDS* gene. The  
137 transcription of gRNA cassette was driven by OsU3 promoter (Fig. 2a). Target sites of  
138 *PDS* were shown in Fig. 2b. The designed PTG-Cas9 system was delivered into  
139 protoplasts of ST166 to examine the editing effect. Two days after transfection, the

140 genomic DNA of protoplasts was released, and the target regions were PCR-amplified,  
141 followed by library construction and high-throughput sequencing (Fig.1a). For library  
142 construction, the target region of 1&2 and 3&4 were amplified separately, using primers  
143 F1 and R1, and F2 and R2, respectively (Fig. 2b). We successfully detected editing  
144 events in the sequencing data. As shown in Fig. 2c, representative reads carrying  
145 mutations of target 1, 2, 3 and 4 were listed, and insertion, deletion, and substitution  
146 editing events were detected at all of the four target sites. These results showed that the  
147 designed PTG-Cas9 multiplex genome editing system was functional and all the  
148 designed target sites could be successfully edited in *Phalaenopsis*.

149

### 150 **Improvement of PTG-Cas9 editing efficiency with modified sgRNA structure**

151 Single-guide RNA (sgRNA) is indispensable for CRISPR/Cas9 system. Therefore,  
152 optimizing sgRNA structure is a feasible way to improve the efficiency of CRISPR-  
153 Cas9 system<sup>34-36</sup>. Here, to improve the efficiency of PTG-Cas9 system, the classical  
154 sgRNA scaffold was swapped for a modified sgRNA scaffold, that has been shown to  
155 improve editing efficiency in TZM-bl cells and rice<sup>35,36</sup>, and the modified PTG-Cas9  
156 system was termed as PTGm-Cas9 system. As shown in Fig. 3a, the original sgRNA  
157 was modified by extending the duplex and mutating continuous sequence of Ts, a  
158 potential transcription pause site, at position 4 to C. To investigate the editing efficiency  
159 of PTGm-Cas9 system, plasmids expressing PTGm-Cas9 system or PTG-Cas9 system  
160 were transformed into protoplasts of *Phalaenopsis* ST166 separately, and the target  
161 regions were amplified for the library construction and sequencing. The analysis results  
162 showed that, in T1 (one of the three independent experiments), the mutation rates of the  
163 four target sites were 1.15%, 0.71%, 0.74%, 1.29% respectively, totaling 3.89%, when  
164 using PTG-Cas9 system. In contrast, the corresponding mutation rates were 1.44 %,  
165 0.82%, 0.83%, 1.38% respectively, totaling 4.47%, when using PTGm-Cas9 system  
166 (Fig. 3b). The editing efficiency was improved in PTGm-Cas9 system compared to that  
167 in PTG-Cas9 system. And this observation was reproducible when the other two  
168 batches were tested (Fig. 3b, S2). Overall, our data suggested that the modified sgRNA  
169 structure was also capable of improving the editing efficiency of CRISPR/Cas9 system  
170 in *Phalaenopsis*, and the tRNA-based multiplex editing tools for *Phalaenopsis* could  
171 also be improved by optimizing the sgRNA structure.

172

### 173 **Assessment of DP11-Cpf1 multiplex genome editing system in *Phalaenopsis* via** 174 **protoplast technology**

175 Compared to CRISPR/Cas9 system, Cpf1 endonuclease has a smaller molecular weight,  
176 and requires shorter CRISPR RNA (crRNA)<sup>37,38</sup>. These advantages of CRISPR/Cpf1  
177 system could help to reduce the overall size of the plant transformation vector, making  
178 it more suitable for multiplexed genome editing for plants<sup>39</sup>. However, the  
179 CRISPR/Cpf1 system has not been applied in Orchidaceae so far. Here, we developed  
180 a multiplex genome editing tool for *Phalaenopsis*, named DP11-Cpf1 (dual Pol II  
181 promoter-Cpf1) (Fig. 4a). The *Phalaenopsis* codon-optimized LbCpf1 is driven by

182 Super promoter, and the multi-crRNA expression cassette contains a double ribozyme<sup>21</sup>  
183 as well as four DR-guide units<sup>40</sup> that each contains 21 bp of DR sequence and 23 bp of  
184 guide sequence. *Cestrum Yellow Leaf Curling Virus* (CmYLCV)<sup>41</sup> promoter and Poly  
185 (A) signal were utilized for multi-crRNA expression and transcription termination  
186 respectively. Similarly, four target sites of *PDS* gene were selected for simultaneous  
187 targeting by the designed DPPII-Cpf1 system (Fig. 4b). The four target regions were  
188 respectively amplified from the genomic DNA of protoplasts with or without  
189 transfection, with primers F3 and R3. The sequencing results (Fig. 4c) showed that the  
190 mutation rates of four target sites were 1.04%, 3.80%, 4.13%, and 9.63% respectively,  
191 totaling 18.60%, in T1. The editing events were detected at all of the four target sites.  
192 And this observation was further confirmed by other two batches of testing, T2 (2.79%,  
193 1.23%, 1.84%, 7.87%, totaling 13.73%) and T3 (3.29%, 1.39%, 1.84%, and 1.93%,  
194 totaling 14.44%). Our data indicated that DPPII-Cpf1 multiplex genome editing system  
195 was also functional and all the designed target sites could be successfully edited in  
196 *Phalaenopsis*.

197

## 198 Discussion

199 With the increasing knowledge on genome sequences of Orchidaceae, feasible genome  
200 editing tools for these valuable plant species are urgently needed. The protoplast  
201 technology and multiplex genome editing toolkits established in this study not only  
202 provide useful tools for targeted editing in *Phalaenopsis*, but also hold great potentials  
203 to extend to other Orchid plants, therefore facilitating the research of orchid biology.

204

205 Transient protoplast transfection technology has been widely applied for plant biology  
206 researches. Orchid protoplast had been successfully isolated from *Dendrobium*<sup>27-29</sup>, and  
207 *Phalaenopsis*<sup>30-32</sup>, using the suspension cells, leaves, flower petals, or callus. Until  
208 recently, the orchid protoplast transient expression system was reported only in two  
209 *Phalaenopsis* species, *Phalaenopsis aphrodite subsp. formosana* (m1663)<sup>31</sup> and  
210 *Phalaenopsis* hybrid cultivar 'Ruili Beauty'<sup>32</sup>, and *Cymbidium* orchid<sup>33</sup>. However,  
211 compared to the protoplast technology established in this study, these protoplast  
212 isolation systems are suboptimal. One requires young leaves of shoots induced from  
213 flower nodal buds, and the others require fully open flower petals. These materials are  
214 not readily available throughout the year, which would seriously impede the  
215 sustainability of orchid researches. In this study, the protoplasts were isolated from  
216 seedling leaves of *Phalaenopsis* ST166, cultured in multiplication medium, which  
217 could ensure an adequate source of experimental materials throughout the year.  
218 Moreover, in this study, the enzymolysis time is only 3 h, which is much shorter than  
219 the reported 6~16 h<sup>31,32</sup>. These advantages will significantly shorten the experimental  
220 period and improve the efficiency of research. In the future, with the help of a  
221 combination of high-throughput CRISPR screening technologies<sup>42</sup> and protoplast  
222 transfection and regeneration technology<sup>28,30</sup> in Orchidaceae, researchers could  
223 extensively establish the large-scale orchid mutant library and provide abundant  
224 resources for orchid gene function and breeding studies.

225

226 In addition, the direct PCR method was developed in this study to amplify target  
227 sequences from *Phalaenopsis* protoplast without genomic DNA extraction, providing a  
228 great convenience to the efficiency analysis. Compared with previous reports that need  
229 to prepare large protoplast samples for genomic DNA extraction and PCR amplification,  
230 our protoplast direct PCR method is superior for micro samples requirements, free from  
231 DNA extraction, short experiment period, and potential to fit high-throughput screening  
232 system. This *Phalaenopsis* protoplast direct PCR method also has the potential to  
233 extend to other plant species.

234

235 tRNA processing systems are virtually conserved in all organisms. Because of the  
236 minimized sgRNA expression cassette and increased sgRNA transcript level, the  
237 editing efficiency of PTG-Cas9 system was higher than that of a single-gRNA-  
238 containing construct<sup>26</sup>. PTG-Cas9 multiplex genome editing tools have been applied in  
239 many plants, but not in orchid yet. Nevertheless, multiplex genome editing toolkits are  
240 more efficient, which could make up the defect of the low efficiency of stable genetic  
241 transformation in Orchidaceae. In addition, genetic redundancy is common in orchid  
242 genome. For example, MADS-box genes are important and potential gene resources for  
243 orchid flower development and modification research<sup>43,44</sup>. But there are 51 putative  
244 functional MADS-box genes in *Phalaenopsis equestris*, and 20 of them are highly  
245 expressed in flower tissue, while 5 are specifically expressed in flower<sup>3</sup>. It is a great  
246 challenge to obtain different combinations of MADS-box gene mutants simultaneously  
247 through the traditional approach to study the function of these MADS-box genes.  
248 However, the PTG-Cas9 multiplex genome editing tool, developed in this study,  
249 provides an ideal solution to solve this problem. Moreover, we also found TaU6 and  
250 OsU3 promoter showed the similar multiplex genome editing efficiency (Fig. S3), and  
251 this further enriches the PTG-Cas9 multiplex genome editing tools.

252

253 The modified sgRNA structure might enhance the ability of binding to Cas9 or increase  
254 the stability of itself to improve the editing efficiency of CRISPR/Cas9 system<sup>35</sup>. In this  
255 study, we found that the modified sgRNA scaffold could improve the efficiency of PTG-  
256 Cas9 multiplex genome editing system in orchid plants. However, the improvement is  
257 limited. Hu *et al.* significantly increased the editing efficiency by using modified  
258 sgRNA structure and strong endogenous promoters in rice<sup>36</sup>, and the efficiency of  
259 editing tools with modified sgRNA varies with different target sites<sup>35,36</sup>. This indicates  
260 that the PTGm-Cas9 system can be further optimized in the future, such as developing  
261 the strong orchid endogenous promoters to drive the expression of Cas9 and sgRNA  
262 cassette, using the orchid codon-optimized Cas9, and selecting more efficient target  
263 sites.

264

265 Up to now, the knowledge on the endogenous promoters of Orchidaceae is still  
266 inadequate, especially on RNA polymerase III (Pol III) promoter, such as U3 and U6  
267 promoter. The efficiency of U3 and U6 promoter varies greatly in different plant species,  
268 and this might lead to a decrease in the efficiency of PTGm-Cas9 system. In addition,

269 there are many limitations to Pol III-based gRNA expression. U3 and U6 promoters are  
270 constitutive promoters, and they cannot be used to generate cell- or tissue-specific  
271 gRNA expression. In the present study, we successfully used CmYLCV, a RNA  
272 polymerase II (Pol II) promoter comparable with 35S promoter<sup>41</sup>, to drive the ribozyme-  
273 based multi-crRNA expression in DP11-Cpf1 system in *Phalaenopsis*. Based on DP11-  
274 Cpf1 system, the CmYLCV promoter can be replaced with orchid flower cell- or tissue-  
275 specific promoter to precisely edit the genes related to floral morphogenesis, facilitating  
276 precise breeding and floral organ development researches. In addition, in this study,  
277 DP11-Cpf1 system is about 1.4 kb less in length than that of PTGm-Cas9 system, and  
278 these features may moderate the difficulty of plasmid construction and improve the  
279 efficiency of genetic transformation. Thus, DP11-Cpf1 system could accommodate  
280 much more editing sites in one construction. Moreover, the total editing efficiency of  
281 DP11-Cpf1 system is about 4 times as much as PTGm-Cas9 system, indicating that  
282 DP11-Cpf1 system might be a much more potential multiplex genome editing tool in  
283 Orchidaceae plants. Considering that CRISPR/Cpf1 is temperature-sensitive for  
284 plants<sup>45,46</sup> and Orchidaceae is usually high temperature-resistant, researchers could  
285 further determine the optimum temperature to improve the editing efficiency of DP11-  
286 Cpf1 system during orchid genetic transformation.

287

288 In summary, we successfully developed efficient multiplex genome editing tools  
289 (PTGm-Cas9 and DP11-Cpf1), and a protoplast-based screening system for  
290 *Phalaenopsis*. The protoplast-based screening platform provide a valuable foundation  
291 for developing more diverse and efficient genome editing toolkits for Orchidaceae, such  
292 as base editors and transcription regulation toolkits. Our study may also greatly promote  
293 the application of CRISPR/Cas multiplex genome editing technologies in Orchidaceae,  
294 facilitating large-scale orchid mutant library construction and orchid gene function and  
295 precise breeding studies.

296

## 297 **Materials and methods**

### 298 **Plant materials and growth conditions**

299 *Phalaenopsis* ST166 was purchased from Shenzhen Nongke Plant Clone Seedling Co.,  
300 Ltd. The seedlings were cultured in illumination incubator at 25°C (light/dark  
301 photoperiod of 16 h/8 h).

302

### 303 **Protoplast isolation and transfection**

304 The modified orchid protoplast isolation and transfection protocol was based on the  
305 method described by Yoo et al.<sup>47</sup>. Two-month-old *Phalaenopsis* ST166 seedling's  
306 leaves were used for protoplast isolation. The leaves were cut into 0.5~1.0-mm strips  
307 using a fresh scalpel. The strips were transferred to a 60 mm petri dish containing 5 mL  
308 freshly prepared protoplast isolation solution (PIS). The PIS was made of 1% [w/v]  
309 Cellulase 'Onozuka' R-10 (Yakult Pharmaceutical), 0.2% [w/v] macerozyme R-10  
310 (Yakult Pharmaceutical), 10 mM CaCl<sub>2</sub> (Sigma, C5670), 0.4 M D-mannitol (Sigma,  
311 M1902), 20 mM KCl (Sigma, P5405), 0.1% BSA (Sigma, V900933), and 20 mM MES



312 (pH 5.7, Sigma, M3671). The strips were digested for 3 h at 25 °C with gentle shaking in  
313 darkness. The protoplast suspension was then filtered through 40 µm nylon mesh to a  
314 50 mL sterile tube, and wash the nylon mesh with equal volume of W5 solution, to  
315 remove tissue debris. The W5 solution contained 154 mM NaCl (Sigma, S5886), 5 mM  
316 KCl, 125 mM CaCl<sub>2</sub>, and 2 mM MES (pH 5.7). The solution was centrifuged at 100 g  
317 for 5 min at 22 °C, and removed the supernatant. The protoplast suspension was washed  
318 gently one more time with 5 mL W5 solution. Then the collected protoplasts were  
319 resuspended with 1 mL W5 solution. The protoplast cell concentration was measured  
320 using a hemocytometer. After counting, the protoplast suspension was centrifuged at  
321 100 g for 3 min at 22°C, and resuspended with suitable volume of MMG solution to  
322 adjust the cell concentration about to 1×10<sup>6</sup> cells/mL. The MMG solution contains 0.4  
323 M D-mannitol, 5 mM MgCl<sub>2</sub>, and 4.0 mM MES, pH 5.7.

324 For protoplast transformation, the plasmid was delivered into *Phalaenopsis* protoplast  
325 by PEG-mediated transfection method. 30 µg plasmid DNA (prepared by TIANGEN  
326 EndoFree Maxi Plasmid Kit, DP117) was used and mixed with 200 µL protoplast  
327 suspension. Then, equal volume (230 µL) of freshly prepared PEG solution was added  
328 into the mixture. The PEG solution contains 0.3 M D-mannitol, 100 mM CaCl<sub>2</sub>, and  
329 30% PEG-4000 [w/v] (Sigma, 81240), PH 5.7. The transfection mixture was mixed  
330 gently and incubated at room temperature for 20 min. And then, the transfection  
331 reaction was stopped by adding 1 mL W5 solution. The mixture was centrifuged at 100  
332 g for 3 min at 22°C to collect the protoplasts. The transfected protoplasts were gently  
333 resuspended with 1 mL W5 solution, and transferred to 6-well culture plate. After  
334 incubating 48 h at 25°C in darkness, protoplasts could be harvested for further  
335 experiments.

336

### 337 **Plasmid construction and extraction**

338 For PTG-Cas9 and PTGm-Cas9 plasmids, the OsU3-PTG (Fig. S1) and OsU3-PTGm  
339 (Fig. S2) sequences were synthesized by BGI·Write, and the synthesized sequences  
340 were cut and inserted into the pYLCRISPR/Cas9Pubi-H binary vector<sup>48</sup> using the two  
341 *Bsa* I sites.

342 For DP11-Cpf1 plasmid, first the *Phalaenopsis* codon-optimized LbCpf1 were  
343 synthesized by BGI·Write, and the LbCpf1 fragment was ligated into the pXZ binary  
344 vector, derived from pCAMBIA1300 vector, digested with *Hind* III/*Eco*R I. Second, the  
345 synthesized CmYLCV-HH-gRNAs-HDV (Fig. S3) was digested and inserted into the  
346 *Pst* I/*Xba* I sites of pXZ-Cpf1 vector, generated by the first step. Finally, the Super  
347 promoter was amplified with primers SuperP-F and SuperP-R (Table S1) and cloned  
348 into the plasmid pXZ-Cpf1-gRNAs generated by the previous step. The DP11-Cpf1  
349 plasmid construction was finished and the multi-crRNAs could be replaced using the  
350 two *Aar* I sites.

351

### 352 **Protoplast direct PCR**

353 The transformed protoplasts samples were centrifuged at 100 g for 3 min at 22°C to  
354 collect the protoplasts. And then the protoplasts were treated with 50 µL lysis buffer  
355 (20 mM Tris-HCl, 5 mM EDTA, 400 mM NaCl, 0.3% SDS, 200 µg/mL Proteinase K,

356 PH 8.0) for DNA releasing at 55°C for 1 h. Following that, samples were treated at 95°C  
357 for 10 min. The lysed samples could be used for direct PCR amplification, using KOD  
358 FX Neo enzyme (TOYOBO, KFX-201). The PCR products were purified and used for  
359 library construction or other experiments.

360

### 361 **Mutation Detection and Analysis**

362 Target sites of *PDS* gene were PCR-amplified using primers listed in Table S1. For  
363 high-throughput sequencing, the PCR products were purified with MinElute PCR  
364 Purification Kit (QIAGEN, 28006), and then were used for library construction using  
365 MGIEasy AmpSeq Library Prep Kit (MGI, 1000005257), and sequenced at BGISEQ-  
366 500 platform. Mutations were calculated based on the presence of mutations around the  
367 cleavage site. Specifically, the high quality clean data were obtained using fastp<sup>49</sup>, a  
368 robust FASTQ data pre-processing tool, to filter low quality reads, trim adapter and  
369 merge into a complete sequence. Bowtie 2<sup>50</sup> was applied to align clean data to *PDS*  
370 gene sequence obtained by Sanger Sequencing. Mutation detection was analyzed using  
371 homemade well-packaged Python scripts.

372

### 373 **Author contributions**

374 Xia K., Zhang D., and Liu G. performed the protoplast transformation and prepared the  
375 figures. Yang Y. performed the library construction. Xu X., and Zhang D. performed  
376 the sequencing data analysis. Gu Y., Sun H.-X., Zhang G. and Xia K. designed the  
377 experiments, interpreted the data and wrote the manuscript. All authors read and  
378 approved the final manuscript.

379

### 380 **Acknowledgments**

381 This research was supported by China Postdoctoral Science Foundation (No.  
382 2018M643197), and Guangdong Provincial Key Laboratory of Genome Read and  
383 Write (No. 2017B030301011), and Science, Technology and Innovation Commission  
384 of Shenzhen Municipality (No. JCYJ20170817151501595). We also sincerely thank  
385 the support provided by China National GeneBank (CNGB).

386

### 387 **Competing interests**

388 The authors declare that they have no competing interests.

389

### 390 **Supplemental materials**

391 Figure S1 The protoplast transient expression technology in *Phalaenopsis*.

392 Figure S2 PTGm-Cas9 system has a higher editing efficiency in *Phalaenopsis*.

393 Figure S3 PTG-Cas9 system with TaU6 promoter is effective in *Phalaenopsis*.

394 Figure S4 DNA sequence of multi-gRNA expression cassette of PTG-Cas9 system with  
395 OsU3 promoter.

396 Figure S5 DNA sequence of multi-gRNA expression cassette of PTG-Cas9 system with  
397 TaU6 promoter.

398 Figure DNA sequence of multi-gRNA expression cassette of PTGm-Cas9 system.

399 Figure S7 DNA sequence of multi-crRNA expression cassette of DP1I-Cpf1 system.

400 Table S1. Primers used in this study.

401

## 402 **Data availability**

403 The data that support the findings of this study have been deposited into CNGB  
404 Sequence Archive<sup>51</sup> of CNGBdb<sup>52</sup> with accession number CNP0001286.

405

## 406 **References**

- 407 1. Cai, J. *et al.* The genome sequence of the orchid *Phalaenopsis equestris*. *Nature genetics*  
408 **47**, 65–72 <http://dx.doi.org/10.1038/ng.3149> (2015).
- 409 2. Zhang, G.Q. *et al.* The *Dendrobium catenatum* Lindl. genome sequence provides insights  
410 into polysaccharide synthase, floral development and adaptive evolution. *Scientific*  
411 *reports* **6**, 19029–19039 <http://dx.doi.org/10.1038/srep19029> (2016).
- 412 3. Wang, Y. *et al.* Simultaneous editing of three homoeoalleles in hexaploid bread wheat  
413 confers heritable resistance to powdery mildew. *Nature biotechnology* **32**, 947–951  
414 <http://dx.doi.org/10.1038/nbt.2969> (2014).
- 415 4. Wang, Z.P. *et al.* Egg cell-specific promoter-controlled CRISPR/Cas9 efficiently generates  
416 homozygous mutants for multiple target genes in *Arabidopsis* in a single generation.  
417 *Genome biology* **16**, 1–12 <http://dx.doi.org/10.1186/s13059-015-0715-0> (2015).
- 418 5. Zhang, H. *et al.* The CRISPR/Cas9 system produces specific and homozygous targeted  
419 gene editing in rice in one generation. *Plant biotechnology journal* **12**, 797–807  
420 <http://dx.doi.org/10.1111/pbi.12200> (2014).
- 421 6. Svitashv, S., Schwartz, C., Lenderts, B., Young, J.K. & Mark Cigan, A. Genome editing in  
422 maize directed by CRISPR-Cas9 ribonucleoprotein complexes. *Nature Communications* **7**,  
423 13274–13281 <http://dx.doi.org/10.1038/ncomms13274> (2016).
- 424 7. Soyk, S. *et al.* Bypassing Negative Epistasis on Yield in Tomato Imposed by a  
425 Domestication Gene. *Cell* **169**, 1142–1155 <http://dx.doi.org/10.1016/j.cell.2017.04.032>  
426 (2017).
- 427 8. Wang, P. *et al.* High efficient multisites genome editing in allotetraploid cotton  
428 (*Gossypium hirsutum*) using CRISPR/Cas9 system. *Plant biotechnology journal* **16**, 137–  
429 150 <http://dx.doi.org/10.1111/pbi.12755> (2018).
- 430 9. Wang, T., Zhang, H. & Zhu, H. CRISPR technology is revolutionizing the improvement of  
431 tomato and other fruit crops. *Horticulture research* **6**, 1–13  
432 <http://dx.doi.org/10.1038/s41438-019-0159-x> (2019).
- 433 10. Tong, C.-G., Wu, F.-H., Yuan, Y.-H., Chen, Y.-R. & Lin, C.-S. High-efficiency CRISPR/Cas-  
434 based editing of *Phalaenopsis* orchid MADS genes. *Plant biotechnology journal* **18**, 889–  
435 891 <http://dx.doi.org/10.1111/pbi.13264> (2019).
- 436 11. Kui, L. *et al.* Building a Genetic Manipulation Tool Box for Orchid Biology: Identification of  
437 Constitutive Promoters and Application of CRISPR/Cas9 in the Orchid, *Dendrobium*

- 438 officinale. *Frontiers in plant science* **7**, 2036-2049  
439 <http://dx.doi.org/10.3389/fpls.2016.02036> (2017).
- 440 12. Zhang, Y., Malzahn, A.A., Sretenovic, S. & Qi, Y. The emerging and uncultivated potential  
441 of CRISPR technology in plant science. *Nature Plants* **5**, 778-794  
442 <http://dx.doi.org/10.1038/s41477-019-0461-5> (2019).
- 443 13. Chen, K., Wang, Y., Zhang, R., Zhang, H. & Gao, C. CRISPR/Cas Genome Editing and  
444 Precision Plant Breeding in Agriculture. *Annual review of plant biology* **70**, 667-679  
445 <http://dx.doi.org/10.1146/annurev-arplant-050718-100049> (2019).
- 446 14. Liang, Z. *et al.* Efficient DNA-free genome editing of bread wheat using CRISPR/Cas9  
447 ribonucleoprotein complexes. *Nature Communications* (Article) **8**, 14261-14266  
448 <http://dx.doi.org/10.1038/ncomms14261> (2017).
- 449 15. Toda, E. *et al.* An efficient DNA- and selectable-marker-free genome-editing system  
450 using zygotes in rice. *Nature Plants* **5**, 363-368 [http://dx.doi.org/10.1038/s41477-019-](http://dx.doi.org/10.1038/s41477-019-0386-z)  
451 [0386-z](http://dx.doi.org/10.1038/s41477-019-0386-z) (2019).
- 452 16. Chen, L. *et al.* A method for the production and expedient screening of CRISPR/Cas9-  
453 mediated non-transgenic mutant plants. *Horticulture research* **5**, 1-12  
454 <http://dx.doi.org/10.1038/s41438-018-0023-4> (2018).
- 455 17. Tang, X. *et al.* Single transcript unit CRISPR 2.0 systems for robust Cas9 and Cas12a  
456 mediated plant genome editing. *Plant biotechnology journal* **17**, 1431-1445  
457 <http://dx.doi.org/doi:10.1111/pbi.13068> (2018).
- 458 18. Ding, D., Chen, K., Chen, Y., Li, H. & Xie, K. Engineering Introns to Express RNA Guides for  
459 Cas9- and Cpf1-Mediated Multiplex Genome Editing. *Molecular plant* **11**, 542-552  
460 <http://dx.doi.org/10.1016/j.molp.2018.02.005> (2018).
- 461 19. Xie, K., Minkenberg, B. & Yang, Y. Boosting CRISPR/Cas9 multiplex editing capability with  
462 the endogenous tRNA-processing system. *Proceedings of the National Academy of*  
463 *Sciences of the United States of America* **112**, 3570-3575  
464 <http://dx.doi.org/10.1073/pnas.1420294112> (2015).
- 465 20. Xu, L., Zhao, L., Gao, Y., Xu, J. & Han, R. Empower multiplex cell and tissue-specific CRISPR-  
466 mediated gene manipulation with self-cleaving ribozymes and tRNA. *Nucleic acids*  
467 *research* **45**, 1-9 <http://dx.doi.org/10.1093/nar/gkw1048> (2016).
- 468 21. Gao, Y. & Zhao, Y. Self-processing of ribozyme-flanked RNAs into guide RNAs in vitro  
469 and in vivo for CRISPR-mediated genome editing. *Journal of Integrative Plant Biology* **56**,  
470 343-349 <http://dx.doi.org/10.1111/jipb.12152> (2014).
- 471 22. Tang, X. *et al.* A CRISPR-Cpf1 system for efficient genome editing and transcriptional  
472 repression in plants. *Nature Plants* **3**, 17018-17040  
473 <http://dx.doi.org/10.1038/nplants.2017.18> (2017).
- 474 23. Faraco, M., Di Sansebastiano, G.P., Spelt, K., Koes, R.E. & Quattrocchio, F.M. One Protoplast  
475 Is Not the Other! *Plant physiology* **156**, 474-478 <http://dx.doi.org/10.1104/pp.111.173708>  
476 (2011).
- 477 24. Lin, C.-S. *et al.* Application of protoplast technology to CRISPR/Cas9 mutagenesis: from  
478 single-cell mutation detection to mutant plant regeneration. *Plant biotechnology journal*  
479 **16**, 1295-1310 <http://dx.doi.org/10.1111/pbi.12870> (2018).
- 480 25. Liang, Z. *et al.* Genome editing of bread wheat using biolistic delivery of CRISPR/Cas9 in  
481 vitro transcripts or ribonucleoproteins. *Nature protocols* **13**, 413-430 (2018).

- 482 26. Huang, X., Wang, Y., Xu, J. & Wang, N. Development of multiplex genome editing toolkits  
483 for citrus with high efficacy in biallelic and homozygous mutations. *Plant molecular*  
484 *biology* **104**, 297-307 <http://dx.doi.org/10.1007/s11103-020-01043-6> (2020).
- 485 27. Hu, W.W., Wong, S.M., Loh, C.S. & Goh, C.J. Synergism in replication of cymbidium mosaic  
486 potexvirus (CymMV) and odontoglossum ringspot tobamovirus (ORSV) RNA in orchid  
487 protoplasts. *Archives of Virology* **143**, 1265-1275  
488 <http://dx.doi.org/10.1007/s007050050374> (1998).
- 489 28. Khentry, Y., Paradornuvat, A., Tantiwivat, S., Phansiri, S. & Thaveechai, N. Protoplast  
490 isolation and culture of Dendrobium Sonia "Bom 17". *Agriculture and Natural Resources*  
491 **40**, 361-369 (2006).
- 492 29. Chongsiang, T., Puisinn, L., LingPick, K. & Mahmood, M. Optimisation of protoplast  
493 isolation protocols using in vitro leaves of Dendrobium crumenatum (pigeon orchid).  
494 *African Journal of Agricultural Research* **5**, 1431-1436  
495 <http://dx.doi.org/10.5897/AJAR.9000516> (2010).
- 496 30. Shrestha, B.R., Tokuhara, K. & Mii, M. Plant regeneration from cell suspension-derived  
497 protoplasts of Phalaenopsis. *Plant cell reports* **26**, 719-725  
498 <http://dx.doi.org/10.1007/s00299-006-0286-3> (2007).
- 499 31. Lin, H.Y., Chen, J.C. & Fang, S.C. A Protoplast Transient Expression System to Enable  
500 Molecular, Cellular, and Functional Studies in Phalaenopsis orchids. *Frontiers in plant*  
501 *science* **9**, 1-13 <http://dx.doi.org/10.3389/fpls.2018.00843> (2018).
- 502 32. Li, J. *et al.* Efficient protoplast isolation and transient gene expression system for  
503 Phalaenopsis hybrid cultivar 'Ruili Beauty'. *In Vitro Cellular & Developmental Biology -*  
504 *Plant* **54**, 87-93 <http://dx.doi.org/10.1007/s11627-017-9872-z> (2018).
- 505 33. Ren, R. *et al.* Highly Efficient Protoplast Isolation and Transient Expression System for  
506 Functional Characterization of Flowering Related Genes in Cymbidium Orchids.  
507 *International journal of molecular sciences* **21**, 1-18  
508 <http://dx.doi.org/10.3390/ijms21072264> (2020).
- 509 34. Chen, B. *et al.* Dynamic imaging of genomic loci in living human cells by an optimized  
510 CRISPR/Cas system. *Cell* **155**, 1479-1491 <http://dx.doi.org/10.1016/j.cell.2013.12.001>  
511 (2013).
- 512 35. Dang, Y. *et al.* Optimizing sgRNA structure to improve CRISPR-Cas9 knockout efficiency.  
513 *Genome biology* **16**, 1-10 <http://dx.doi.org/10.1186/s13059-015-0846-3> (2015).
- 514 36. Hu, X., Meng, X., Liu, Q., Li, J. & Wang, K. Increasing the efficiency of CRISPR-Cas9-VQR  
515 precise genome editing in rice. *Plant biotechnology journal* **16**, 292-297  
516 <http://dx.doi.org/10.1111/pbi.12771> (2017).
- 517 37. Zetsche, B. *et al.* Cpf1 is a single RNA-guided endonuclease of a class 2 CRISPR-Cas  
518 system. *Cell* **163**, 759-771 <http://dx.doi.org/10.1016/j.cell.2015.09.038> (2015).
- 519 38. Fonfara, I., Richter, H., Bratovič, M., Le Rhun, A. & Charpentier, E. The CRISPR-associated  
520 DNA-cleaving enzyme Cpf1 also processes precursor CRISPR RNA. *Nature* **532**, 517-521  
521 <http://dx.doi.org/10.1038/nature17945> (2016).
- 522 39. Alok, A. *et al.* The Rise of the CRISPR/Cpf1 System for Efficient Genome Editing in Plants.  
523 *Frontiers in plant science* **11**, 1-9 <http://dx.doi.org/10.3389/fpls.2020.00264> (2020).
- 524 40. Wang, M., Mao, Y., Lu, Y., Tao, X. & Zhu, J.K. Multiplex Gene Editing in Rice Using the  
525 CRISPR-Cpf1 System. *Molecular plant* **10**, 1011-1013

- 526 <http://dx.doi.org/10.1016/j.molp.2017.03.001> (2017).
- 527 41. Cermak, T. *et al.* A Multipurpose Toolkit to Enable Advanced Genome Engineering in  
528 Plants. *The Plant cell* **29**, 1196-1217 <http://dx.doi.org/10.1105/tpc.16.00922> (2017).
- 529 42. Gaillochet, C., Develtere, W. & Jacobs, T.B. CRISPR Screens in Plants: Approaches,  
530 Guidelines, and Future Prospects. *The Plant cell* <http://dx.doi.org/10.1105/tpc.20.00463>  
531 (2020).
- 532 43. Tsai, W.C. *et al.* PeMADS6, a GLOBOSA/PISTILLATA-like gene in *Phalaenopsis equestris*  
533 involved in petaloid formation, and correlated with flower longevity and ovary  
534 development. *Plant & cell physiology* **46**, 1125-1139  
535 <http://dx.doi.org/10.1093/pcp/pci125> (2005).
- 536 44. Chen, Y.Y. *et al.* C- and D-class MADS-box genes from *Phalaenopsis equestris*  
537 (Orchidaceae) display functions in gynostemium and ovule development. *Plant & cell*  
538 *physiology* **53**, 1053-1067 <http://dx.doi.org/10.1093/pcp/pcs048> (2012).
- 539 45. Malzahn, A.A. *et al.* Application of CRISPR-Cas12a temperature sensitivity for improved  
540 genome editing in rice, maize, and Arabidopsis. *BMC Biology* **17**, 1-14  
541 <http://dx.doi.org/10.1186/s12915-019-0629-5> (2019).
- 542 46. Li, B. *et al.* The application of temperature sensitivity CRISPR/LbCpf1 (LbCas12a) mediated  
543 genome editing in allotetraploid cotton (*G. hirsutum*) and creation of nontransgenic,  
544 gossypol-free cotton. *Plant biotechnology journal* <http://dx.doi.org/10.1111/pbi.13470>  
545 (2020).
- 546 47. Yoo, S.D., Cho, Y.H. & Sheen, J. Arabidopsis mesophyll protoplasts: a versatile cell system  
547 for transient gene expression analysis. *Nature protocols* **2**, 1565-1572  
548 <http://dx.doi.org/10.1038/nprot.2007.199> (2007).
- 549 48. Ma, X. *et al.* A Robust CRISPR/Cas9 System for Convenient, High-Efficiency Multiplex  
550 Genome Editing in Monocot and Dicot Plants. *Molecular plant* **8**, 1274-1284  
551 <http://dx.doi.org/10.1016/j.molp.2015.04.007> (2015).
- 552 49. Chen, S., Zhou, Y., Chen, Y. & Gu, J. fastp: an ultra-fast all-in-one FASTQ preprocessor.  
553 *Bioinformatics* **34**, i884-i890 <http://dx.doi.org/10.1093/bioinformatics/bty560> (2018).
- 554 50. Langmead, B. & Salzberg, S.L. Fast gapped-read alignment with Bowtie 2. *Nature*  
555 *methods* **9**, 357-359 <http://dx.doi.org/10.1038/nmeth.1923> (2012).
- 556 51. Guo, X. *et al.* CNSA: a data repository for archiving omics data. *Database* **2020**, 1-6  
557 <http://dx.doi.org/10.1093/database/baaa055> (2020).
- 558 52. Chen, F.Z. *et al.* CNGBdb: China National GeneBank DataBase. *Hereditas* **42**, 799-809  
559 <http://dx.doi.org/10.16288/j.ycz.20-080> (2020).

560

561

562 **Figure legends**

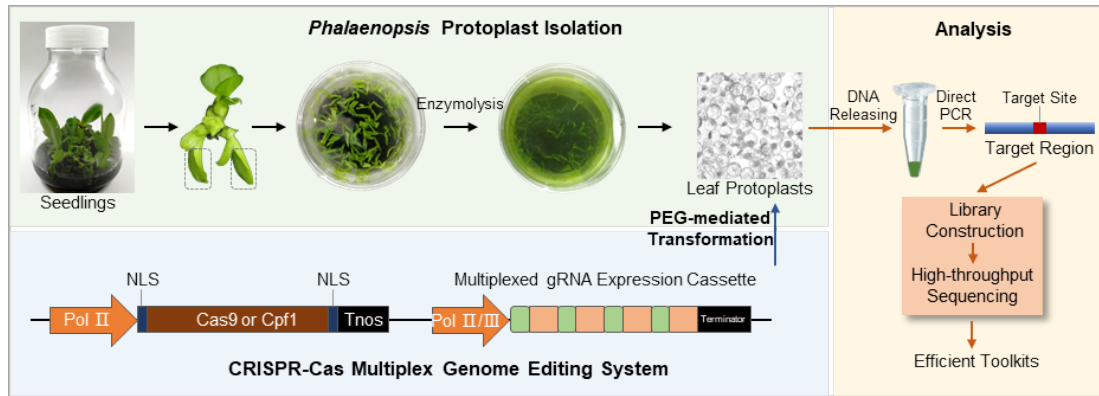

563

564 **Fig. 1 Schematic diagram of efficient multiplex genome editing toolkits screening**  
565 **in *Phalaenopsis* protoplast.** The CRISPR-Cas based multiplex genome editing  
566 plasmids were delivered into protoplasts isolated from proliferation cultured seedling  
567 leaves of *Phalaenopsis*, by PEG-mediated protoplast transfection. After 48 h of  
568 incubation, the protoplasts were collected and the genome DNA was released for direct  
569 PCR amplification. The target regions were purified for library construction and high-  
570 throughput sequencing, and the data was used for the editing efficiency analysis.

571

572

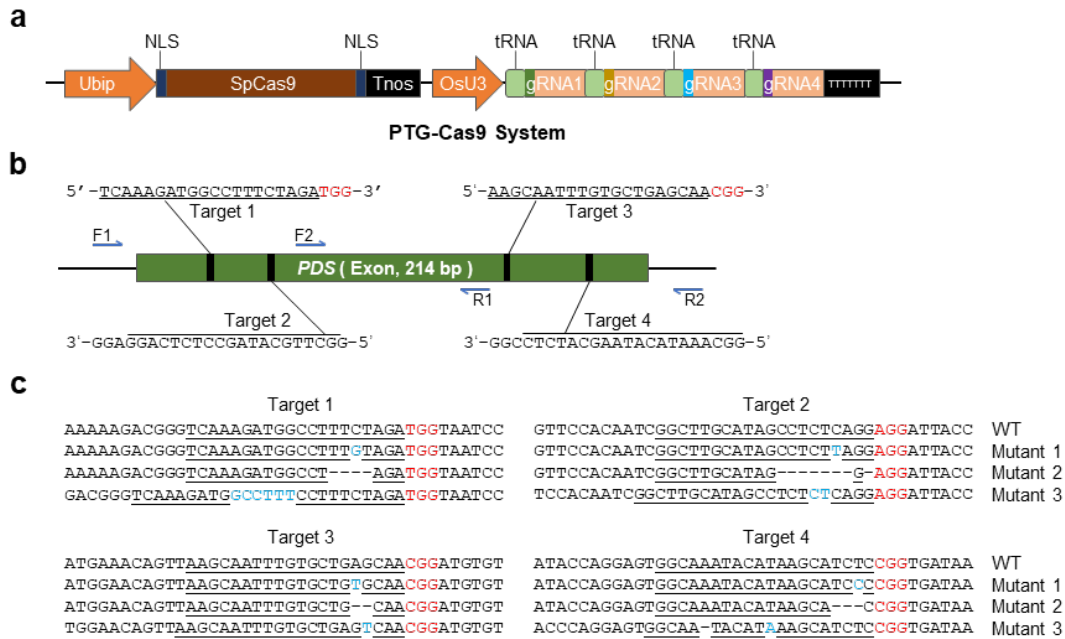

573

574

**Fig. 2 PTG-Cas9 multiplex genome editing system is effective in *Phalaenopsis*.**

575

The architecture of PTG-Cas9 system. The tRNA-mediated multi-gRNAs expression

576

cassette is driven by OsU3 promoter. **b** The illustration of the four targeted sites of *PDS*

577

gene edited by PTG-Cas9 system. The primers used for target region amplification is

578

indicated with blue arrows. F1 and R1 primers were used for the amplification of targets

579

1 and 2. F2 and R2 primers were used for the amplification of targets 3 and 4. **c** The

580

mutations at four target sites edited by PTG-Cas9 system. The plasmid showed in **a** was

581

delivered into *Phalaenopsis* protoplasts, and the editing results were analyzed by high-

582

throughput sequencing. Mutations were listed as representatives. The PAM sequences

583

are highlighted in red. The target sequences are marked by underlines. The insertion or

584

mutation bases are shown in light blue.

585

586



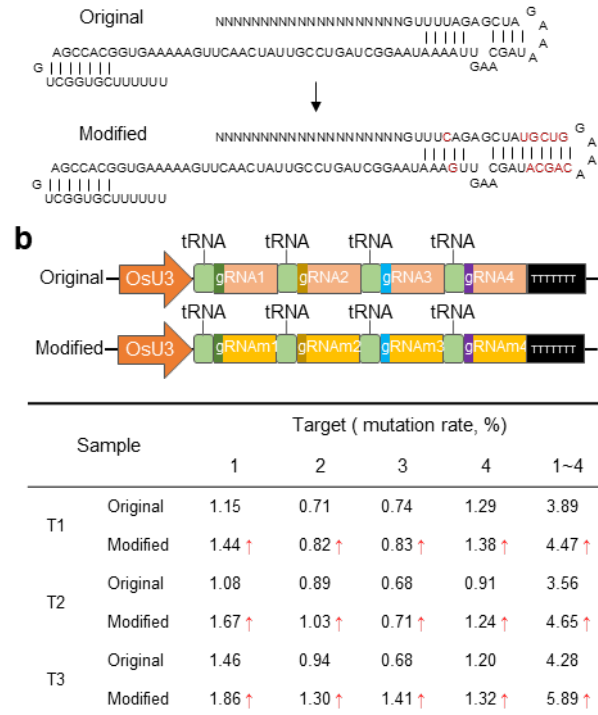

587

588 **Fig. 3 PTGm-Cas9 system improves the editing efficiency in *Phalaenopsis*.** **a**

589 Schematic representation of original and modified sgRNA structure. The duplex

590 extension and mutation in modified sgRNA are highlighted in red. **b** The mutation rate

591 of four target sites of *PDS* gene edited by PTG-Cas9 or PTGm-Cas9. The architecture

592 of multi-gRNAs expression cassette in PTG-Cas9 or PTGm-Cas9. The original and

593 modified sgRNA are shown in orange and yellow respectively. The data in table showed

594 the mutation rate of the four target sites respectively and summarized. T1, T2, and T3

595 indicate three independent experiments. The arrows indicate the improved mutation rate.

596 The sequencing of the amplicons was repeated 3 times, using genomic DNA from three

597 independent protoplast samples. Mutation rate was calculated as the ratio of the number

598 of mutant reads to that of the total reads.

599

600

601

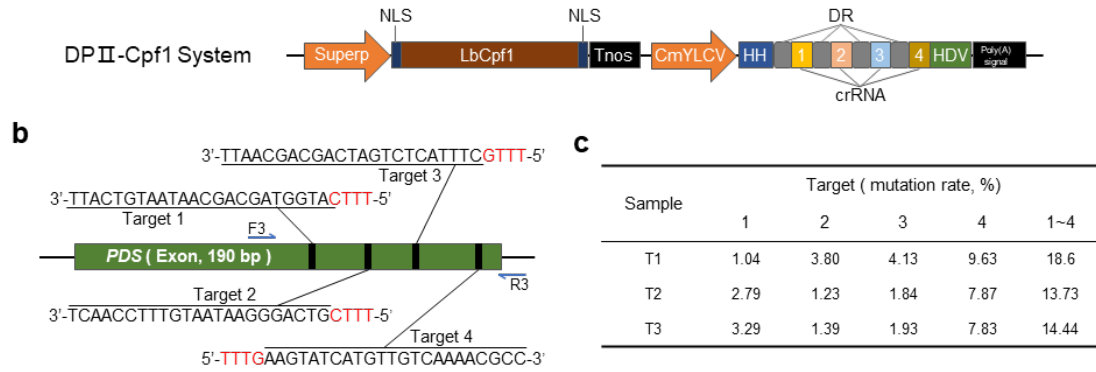

602

603 **Fig. 4 DPII-Cpf1 multiplex genome editing system is effective in *Phalaenopsis*.**

604 The architecture of DPII-Cpf1 system. The ribozyme-based multi-crRNA expression

605 cassette was driven by CmYLCV promoter. HH, hammerhead ribozyme; HDV,

606 hepatitis delta virus ribozyme; DR, direct repeat. **b** The illustration of the four targeted

607 sites of *PDS* gene edited by DPII-Cpf1 system. The primers used for target region

608 amplification are indicated with blue arrows. The PAM sequences are highlighted in

609 red. The target sequences are marked by underlines. **c** The mutation rate of the four

610 target sites edited by DPII-Cpf1 system. The plasmid showed in **a** was delivered into

611 *Phalaenopsis* protoplasts, and the editing results were analyzed by high-throughput

612 sequencing. Mutation rate was calculated as the ratio of the number of mutant reads to

613 that of the total reads. T1, T2, and T3 indicate three independent experiments.

## *Phalaenopsis* Protoplast Isolation

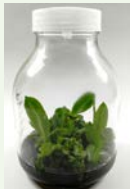

Seedlings

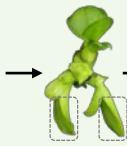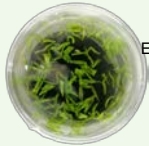

Enzymolysis

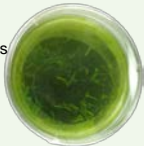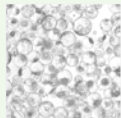

Leaf Protoplasts

PEG-mediated Transformation

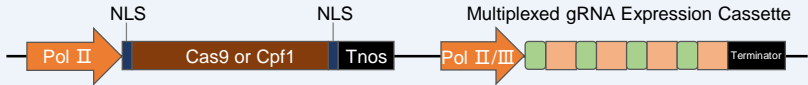

CRISPR-Cas Multiplex Genome Editing System

## Analysis

DNA Releasing

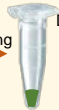

Direct PCR

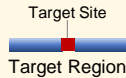

Library Construction

High-throughput Sequencing

Efficient Toolkits

**a**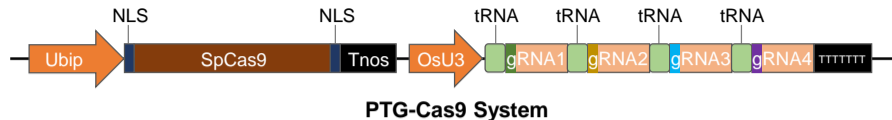**b**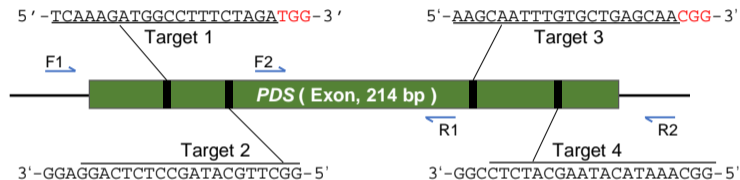**c**

| Target 1                                              | Target 2                                              |          |
|-------------------------------------------------------|-------------------------------------------------------|----------|
| AAAAAGACGGGTCAAAGATGGCCTTTCTAGATGGTAATCC              | GTTCCACAATCGGCTTGCATAGCCTCTCAGGAGGATTACC              | WT       |
| AAAAAGACGGGTCAAAGATGGCCTTTGTAGATGGTAATCC              | GTTCCACAATCGGCTTGCATAGCCTCTTAGGAGGATTACC              | Mutant 1 |
| AAAAAGACGGGTCAAAGATGGCCT----AGATGGTAATCC              | GTTCCACAATCGGCTTGCATAG-----G-AGGATTACC                | Mutant 2 |
| GACGGGTCAAAGATGCCTTTCTTTCTAGATGGTAATCC                | TCCACAATCGGCTTGCATAGCCTCTCTCAGGAGGATTACC              | Mutant 3 |
| Target 3                                              | Target 4                                              |          |
| ATGAAACAGTTAAGCAATTTGTGCTGAGCAA <del>CGG</del> ATGTGT | ATACCAGGAGTGGCAAATACATAAGCATCTC <del>CGG</del> TGATAA | WT       |
| ATGAAACAGTTAAGCAATTTGTGCTGTGCAA <del>CGG</del> ATGTGT | ATACCAGGAGTGGCAAATACATAAGCATC <del>C</del> CGGTGATAA  | Mutant 1 |
| ATGAAACAGTTAAGCAATTTGTGCTG--CAA <del>CGG</del> ATGTGT | ATACCAGGAGTGGCAAATACATAAGCA--- <del>CGG</del> TGATAA  | Mutant 2 |
| TGAAACAGTTAAGCAATTTGTGCTGAGTCAA <del>CGG</del> ATGTGT | ACCCAGGAGTGGCAA-TACATAAAGCATCTC <del>CGG</del> TGATAA | Mutant 3 |

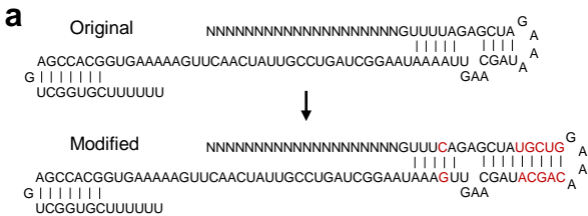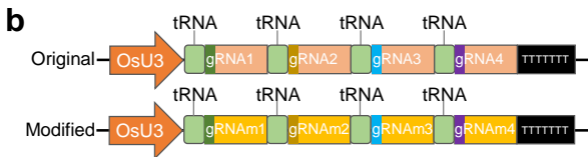

| Sample |          | Target ( mutation rate, %) |        |        |        |        |
|--------|----------|----------------------------|--------|--------|--------|--------|
|        |          | 1                          | 2      | 3      | 4      | 1~4    |
| T1     | Original | 1.15                       | 0.71   | 0.74   | 1.29   | 3.89   |
|        | Modified | 1.44 ↑                     | 0.82 ↑ | 0.83 ↑ | 1.38 ↑ | 4.47 ↑ |
| T2     | Original | 1.08                       | 0.89   | 0.68   | 0.91   | 3.56   |
|        | Modified | 1.67 ↑                     | 1.03 ↑ | 0.71 ↑ | 1.24 ↑ | 4.65 ↑ |
| T3     | Original | 1.46                       | 0.94   | 0.68   | 1.20   | 4.28   |
|        | Modified | 1.86 ↑                     | 1.30 ↑ | 1.41 ↑ | 1.32 ↑ | 5.89 ↑ |

**a**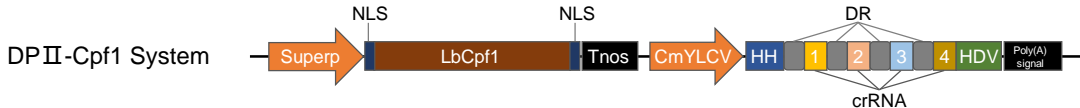**b**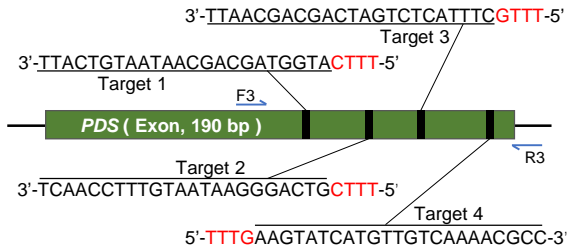**c**

| Sample | Target ( mutation rate, % ) |      |      |      |       |
|--------|-----------------------------|------|------|------|-------|
|        | 1                           | 2    | 3    | 4    | 1~4   |
| T1     | 1.04                        | 3.80 | 4.13 | 9.63 | 18.60 |
| T2     | 2.79                        | 1.23 | 1.84 | 7.87 | 13.73 |
| T3     | 3.29                        | 1.39 | 1.93 | 7.83 | 14.44 |
